# Supplementary material
Source: PubMed Central journal article supplement (PMC6210912)
Supplement: 10.1194_M088419_jlr.M088419-1.pdf [file 10.1194_M088419_jlr.M088419-1.pdf]

## Supplemental Figures and Tables

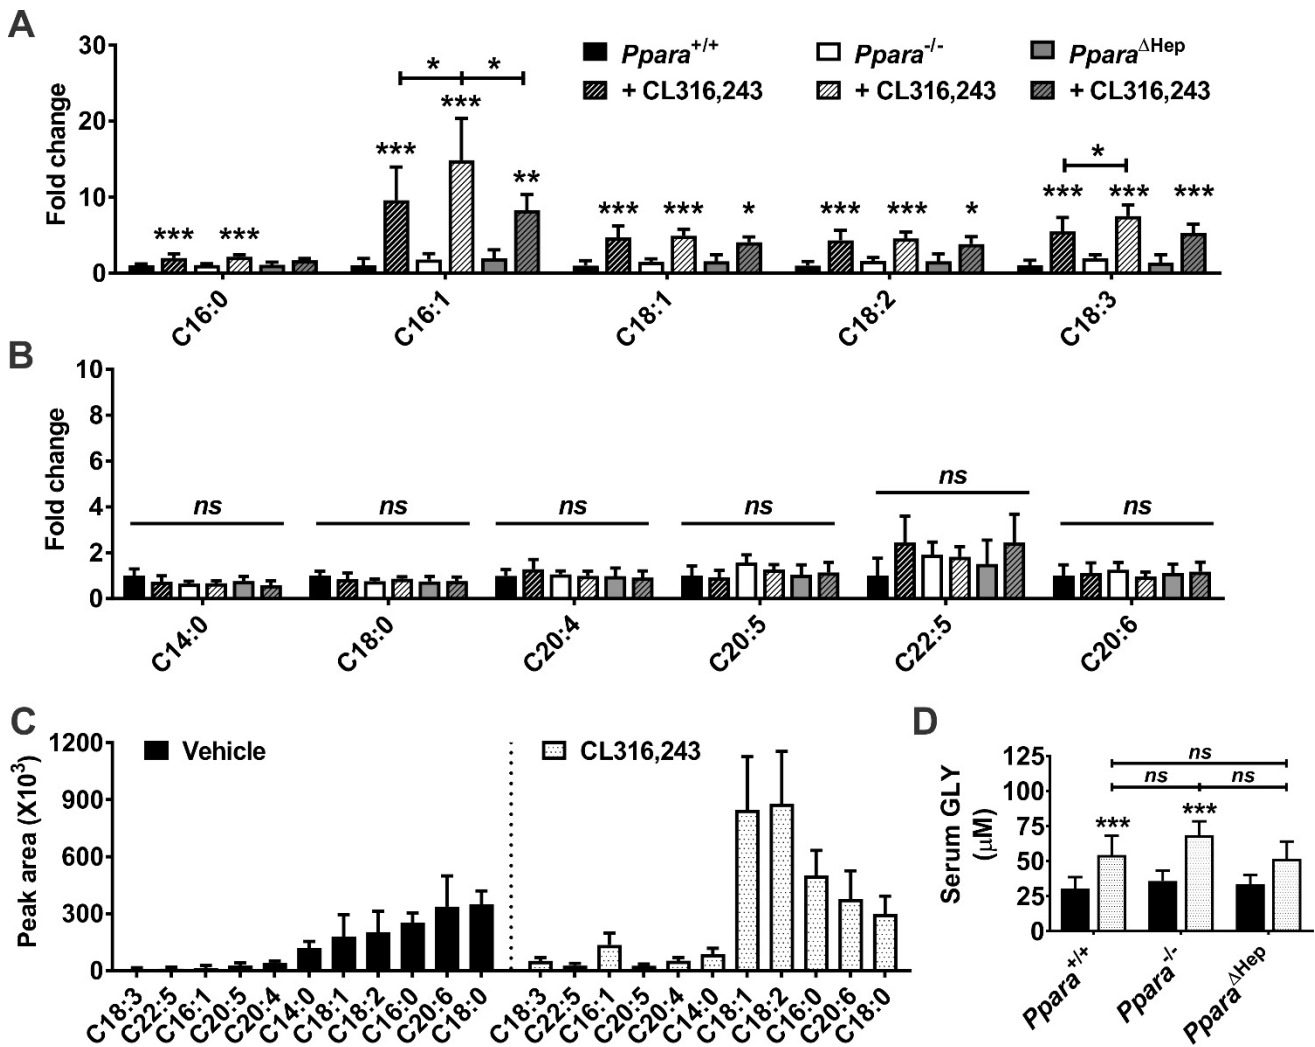

**Figure S1. Extrahepatic *Ppara* normalizes serum FA response in CL316,243 treated *Ppara*<sup>ΔHep</sup> mice.** Mice were given an intraperitoneal injection of either the *Adrb3* receptor agonist CL316,243 or vehicle. One hour later serum was collected for analysis. *Ppara*-dependent (A) and -independent (B) changes in serum FAs after CL316,243 treatment in *Ppara*<sup>+/+</sup>, full-body *Ppara* KO (*Ppara*<sup>-/-</sup>), and hepatocyte-specific *Ppara* KO (*Ppara*<sup>ΔHep</sup>) mice. Mean MS peak area data indicating relative abundance of individual FAs in vehicle and CL316,243 treated wild-type (*Ppara*<sup>+/+</sup>) mouse serum (C). Serum glycerol (GLY) in vehicle and CL316,243 treated mice (D). Fold change data are shown as mean fold change ± standard deviation (SD; n = 5) vs vehicle treated wild-type groups. ‘\*’ above bars indicate significance vs fed group of the same genotype (\* *P* < 0.05, \*\* *P* < 0.01, \*\*\* *P* < 0.001; ns, not significant).

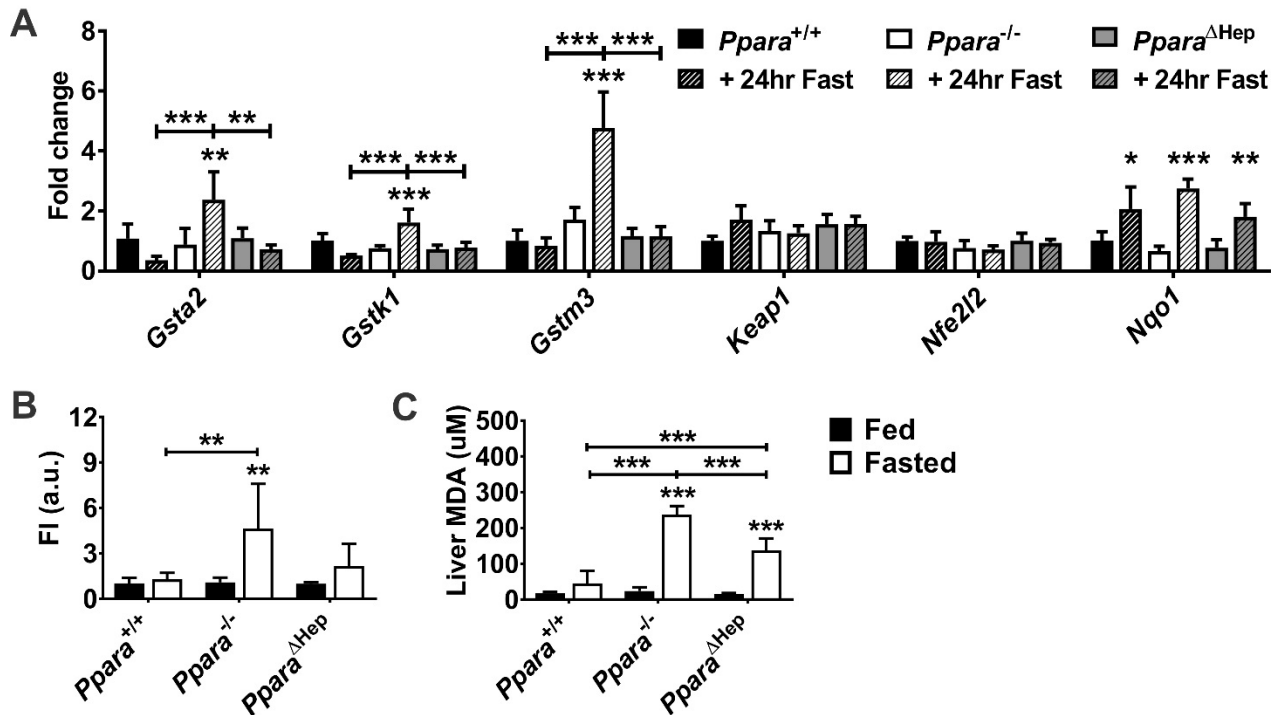

**Figure S2. Extrahepatic PPARA activity prevents fasting-induced oxidative stress and lipotoxicity in the liver.** Wild-type (*Ppara*<sup>+/+</sup>), full-body KO (*Ppara*<sup>-/-</sup>), and hepatocyte-specific KO (*Ppara*<sup>ΔHep</sup>) mice fed *al libitum* or fasted for 24 hours then livers collected for RNA isolation and lysate preparation. Oxidative stress marker (*Gsta2*, *Gstk1*, *Gstm3*, *Keap1*, *Nfe2l2*, *Nqo1*) expression was measured by qRT-PCR (A). Hepatic reactive oxygen species (ROS) were measured by 2',7'-dichlorofluorescein diacetate (DCFDA) assays (B). Malondialdehyde (MDA) levels were determined as an indicator of lipid peroxidation (LPO) (C). qRT-PCR data were normalized to beta actin (*Actb*) and expressed as fold change wild-type control. Data are mean ± standard deviation (SD; n = 5). '\*' above bars indicate significance vs fed group of the same genotype (\* *P* < 0.05, \*\* *P* < 0.01, \*\*\* *P* < 0.001).

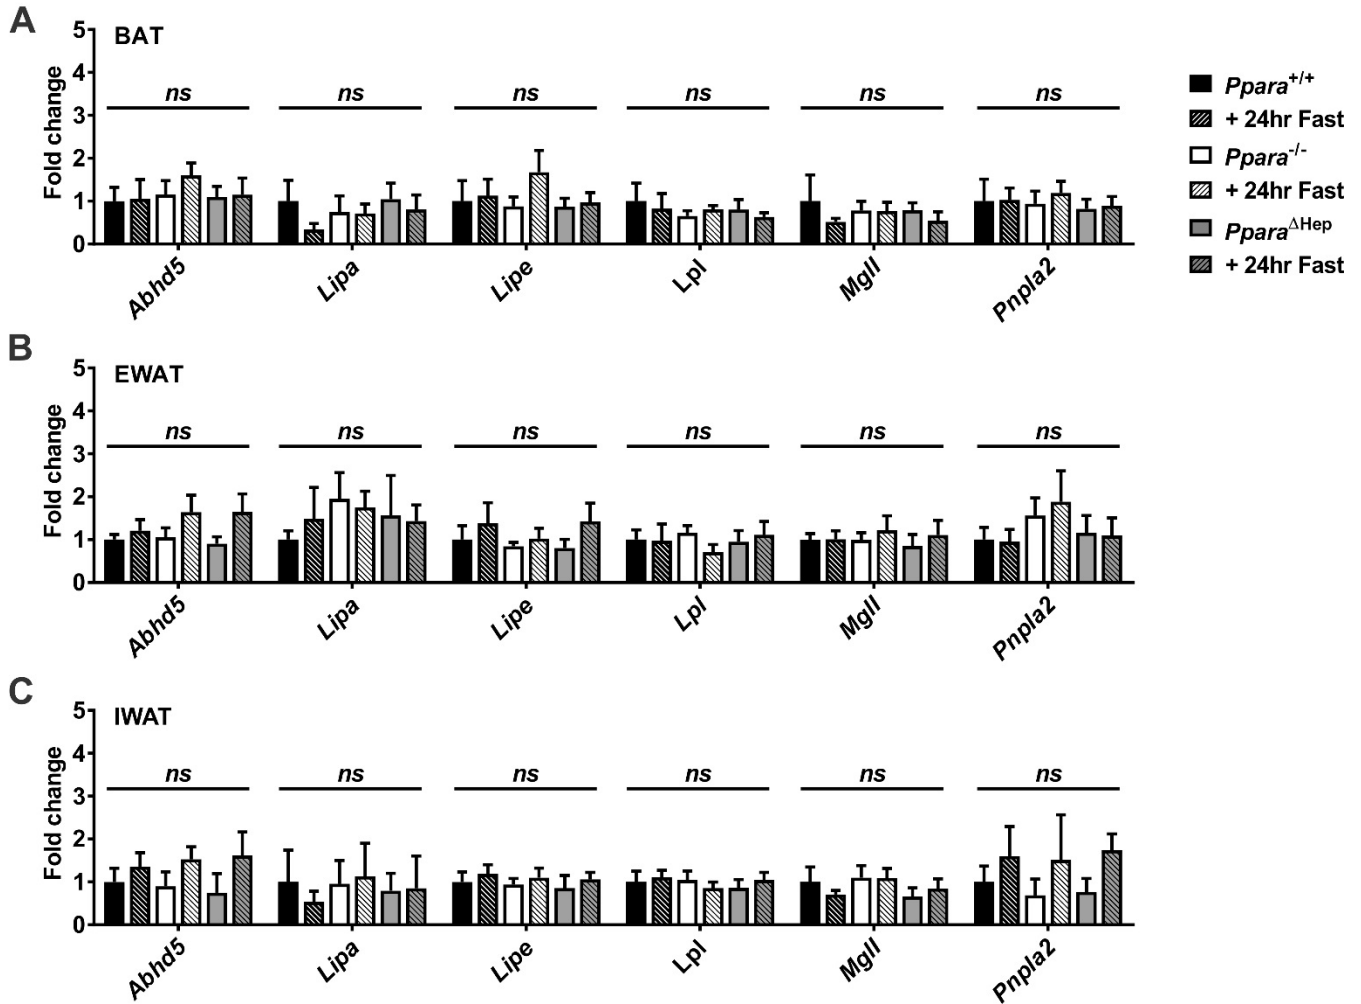

**Figure S3. *Ppara* does not impact lipase expression in adipose depots.** Mice were fasted for 24 hours then tissues collected for RNA isolation and qRT-PCR analysis. Expression of adipose lipases (*Abhd5*, *Lipa*, *Lipe*, *Lpl*, *MglI*, *Pnpla2*) were measured in brown adipose tissue (BAT) (A), epididymal white adipose tissue (EWAT) (B), and inguinal white adipose tissue (IWAT) (C). Data normalized to beta actin (*Actb*) and expressed as fold change wild-type control. Data are mean  $\pm$  standard deviation (SD; n = 5). ‘\*’ above bars indicate significance vs fed group of the same genotype (\*  $P < 0.05$ , \*\*  $P < 0.01$ , \*\*\*  $P < 0.001$ ; ns, not significant).

**Table S1. GC-MS mass parameters**

| Peak ID | Fatty acid                               | C:D <sup>a</sup>              | Qualifier (m/z)                 | RT (min) | R <sup>2</sup> (1-100 µg/ml) |
|---------|------------------------------------------|-------------------------------|---------------------------------|----------|------------------------------|
| 1       | Decanoate                                | C10:0                         | 74/87/143/155/186               | 8.4      | 0.9732                       |
| 2       | Dodecanoate                              | C12:0                         | 74/87/143/171/183/214           | 10.4     | 0.9972                       |
| 3       | Tridecanoate                             | C13:0                         | 143/185                         | 11.5     | 0.9526                       |
| 4       | Myristoleate                             | C14:1 (9Z)                    | 166/208/240                     | 12.6     | 0.9865                       |
| 5       | Myristate                                | C14:0                         | 74/87/143/199                   | 12.7     | 0.9941                       |
| 6       | Pentadecanoate                           | C15:0                         | 185/199/213/225/256             | 13.9     | 0.9654                       |
| 7       | Palmitoleate                             | C16:1 (9Z)                    | 50/69/74/ 236/194/268           | 14.8     | 0.9912                       |
| 8       | Palmitate                                | C16:0                         | 74/87/227/270                   | 15.1     | 0.9904                       |
| 9       | gamma-Linolenate                         | C18:3 (6Z,9Z,12Z)             | 79/93/107/121/150/194/292       | 16.8     | 0.9865                       |
| 10      | Elaidate                                 | C18:1 (9E)                    | 180/152/235/253/194/143/128/123 | 17.1     | 0.9734                       |
| 11      | Arachidonate                             | C20:4 (5Z,8Z,11Z,14Z)         | 79/91/119//105/133/150          | 18.8     | 0.9610                       |
| 12      | cis-5,8,11,14,17-Eicosapentaenoate       | C20:5 (5Z,8Z,11Z,14Z,17Z)     | 79/91/119/147/247/273           | 18.9     | 0.9523                       |
| 13      | Heneicosanoate                           | C21:0                         | 241/297/309/340                 | 20.5     | 0.9824                       |
| 14      | cis-4,7,10,13,16,19-Docosahexaenoic acid | C22:6 (4Z,7Z,10Z,13Z,16Z,19Z) | 71/91/119/131/255/273           | 20.8     | 0.9885                       |
| 15      | cis-13-Docosenoate                       | C22:1 (13Z)                   | 180/236/278/320/352             | 21.2     | 0.9684                       |
| 16      | Benenate                                 | C22:0                         | 143/199/255/311/323/354         | 21.5     | 0.9924                       |
| 17      | Tricosanoate                             | C23:0                         | 129/185/255/269/311/354         | 22.4     | 0.9932                       |
| 18      | Nerovonate                               | C24:1 (15Z)                   | 264/277/306/348/380             | 23.1     | 0.9904                       |
| 19      | Myristic acid-d27 (ISTD)                 | --                            | 281/73/133/177/193/249          | 5.6      | --                           |

<sup>a</sup> C:D; Length of fatty acid chain : Number of double bonds

**Table S2. List primer sets used for qRT-PCR analysis of gene expression**

| <b>Gene Symbol</b> | <b>Forward Primer</b>   | <b>Reverse Primer</b>   |
|--------------------|-------------------------|-------------------------|
| <i>Acadl</i>       | TGCACACATACAGACGGTGC    | CATGGAAGCAGAACCGGAGT    |
| <i>Acadm</i>       | GAACCAGACCTACAGTCGCA    | GCTCCACTAGCAGCTTTCCA    |
| <i>Acox1</i>       | GGGCACGGCTATTCTCACAG    | CATCAAGAACCTGGCCGTCT    |
| <i>Abhd5</i>       | TTCCTACCTGGTGTCCCACA    | TGTAAGTGCAGGGGACACATTT  |
| <i>Apob</i>        | GGTGTATGGCTTCAACCCTGA   | GCTTGAGTTCGTACCTGGACA   |
| <i>Apoc2</i>       | GATGTTGGGAAATGAGGTCCAG  | CCTTGGCAGAGGTCCAGTAAC   |
| <i>Apoe</i>        | CACATTGCTGACAGGATGCC    | AGCGCAGGTAATCCCAGAAG    |
| <i>Cd36</i>        | GATTAATGGCACAGACGCAGC   | CAGATCCGAACACAGCGTAGA   |
| <i>Cpt1b</i>       | GAACACAAATGTGCAAGCAGC   | GCCATGACCGGCTTGATCTC    |
| <i>Cpt2</i>        | CGTACCCACCATGCACTACC    | TTCTGTCTTCCTGAACTGGCTG  |
| <i>Cyp2b9</i>      | TGAGGATGGAGAAGGAGAAGTCA | AGGACTCCATAGTGGAGGGT    |
| <i>Cyp8b1</i>      | TTGCAAATGCTGCCTCAACC    | TAACAGTCGCACACATGGCT    |
| <i>Ehhadh</i>      | CGGTCAATGCCATCAGTCCAA   | TGCTCCACAGATCACTATGGC   |
| <i>Etnppl</i>      | ACATCAGAGGTGTCGGCCTT    | GGCACTGAGAAGTACCCCT     |
| <i>Fgf21</i>       | GCTCTCTATGGATCGCCTCA    | TGGTTTGGGGAGTCCTTCTG    |
| <i>Gsta2</i>       | AGGACTCTCACTAGACCGTGA   | CCTGATGCACTCCATTCTGC    |
| <i>Gstk1</i>       | GGTCTATGCAGATACCAACAC   | GTACTGGCCTTTTCGGGGAA    |
| <i>Gstm3</i>       | GGAAGCACAACCTGTGTGGAG   | GCAGCAGACTATCATGAGCTGTA |
| <i>Keap1</i>       | GCGTGGAGAGATATGAGCCA    | CATACAGCAAGCGGTTGAGC    |
| <i>Lcn2</i>        | TCTGTCCCCACCGACCAAT     | GGAAAGATGGAGTGGCAGACA   |
| <i>Lcn13</i>       | GACCTGGTGGATTACTCTGGG   | ACTGTGGTCTCCAAGTCTCCT   |
| <i>Lipa</i>        | CTGGTGAGGAACACTCGGTC    | CTGGGACCTTTGCCAAAATGG   |
| <i>Lipe</i>        | TGTGACCTGCTTGGTTCAACT   | ATCTGGCACCCCTCACTCCAT   |
| <i>Lpl</i>         | CAGCAGACGCGGGAAGAGATT   | TGGTTGAAGTGGCAGTTAGACA  |
| <i>MglI</i>        | CTGGTCAATGCAGACGGACA    | GACACAAAGATGAGGGCCTTG   |
| <i>Nfe2l2</i>      | GGTTGCCACATTCCTCAAAC    | GCAAGCGACTCATGGTCATC    |
| <i>Nqo1</i>        | CATCACAGGTGAGCTGAAGGA   | ACAATATCTGGGCTCAGGCG    |
| <i>Pdk4</i>        | TTCCAGGCCAACCAATCCAC    | TGGCCCTCATGGCATTCTTG    |
| <i>Pnpla2</i>      | GACTCGTGTTCAGACGGAGA    | CATAGCGCACCCCTTGGAG     |
| <i>Slc27a4</i>     | TCCCATCAGCAACTGTGACC    | GGACGCTAGGGCTCTGAATC    |
| <i>Slc27a5</i>     | CTACGCTGGCTGCATATAGATG  | CCACAAAGGTCTCTGGAGGAT   |
